# Supplementary material for: Study of Flow Pattern Defects and Oxidation Induced Stacking Faults in Czochralski Single-Crystal Silicon Growth
Source: MDPI journal article supplement (doi:10.3390/cryst13020336), 2023-02-16
Supplement: s1 [file s1]

## Supporting Information

Article

# Study of flow pattern defects and oxidation induced stacking faults in Czochralski single-crystal silicon growth

Chao-Chun Yen <sup>a,1</sup>, Anoop Kumar Singh <sup>a,1</sup>, Yi-Min Chung <sup>a</sup>, Hsin-Yu Chou <sup>a</sup>, Dong-Sing Wu <sup>a,b,c,\*</sup>

<sup>a</sup> Department of Materials Science and Engineering, National Chung Hsing University, Taichung 40227, Taiwan

<sup>b</sup> Department of Applied Materials and Optoelectronic Engineering, National Chi Nan University, Nantou 54561, Taiwan

<sup>c</sup> Innovation and Development Center of Sustainable Agriculture, National Chung Hsing University, Taichung 40227, Taiwan

<sup>1</sup> C.-C. Yen and A.K. Singh contributed equally to this work.

\* Correspondence: dsw@ncnu.edu.tw; D.-S. Wu.

**Citation:** Yen, C.-C.; Singh, A.K.; Chung, Y.-M.; Chou, H.-Y.; Wu, D.-S. Study of Flow Pattern Defects and Oxidation Induced Stacking Faults in Czochralski Single-Crystal Silicon Growth. *Crystals* **2023**, *13*, 336. <https://doi.org/10.3390/cryst13020336>

Academic Editors: Sławomir Grabowski and Evgeniy N. Mokhov

Received: 4 January 2023

Revised: 6 February 2023

Accepted: 14 February 2023

Published: 16 February 2023

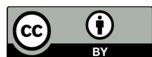

**Copyright:** © 2023 by the authors. Licensee MDPI, Basel, Switzerland. This article is an open access article distributed under the terms and conditions of the Creative Commons Attribution (CC BY) license (<https://creativecommons.org/licenses/by/4.0/>).

## Abbreviation

1. interstitial oxygen ( $O_i$ )
2. Czochralski single-crystal silicon (CZ-Si)
3. flow pattern defects (FPDs)
4. oxidation induced stacking faults (OISFs)
5. pulling rate ( $V$ )
6. temperature gradient ( $G$ )
7. hydrofluoric acid (HF)
8. potassium dichromate ( $K_2Cr_2O_7$ )
9. optical microscope (OM)
10. microwave photoconductive decay ( $\mu$ -PCD)
11. Fourier-transform infrared spectroscopy (FTIR)
12. difference in oxygen concentration (delta  $O_i$ )

## Solution

1. MAE1: consists of HF (49%), nitric acid ( $HNO_3$ , 49%), and acetic acid ( $CH_3COOH$ , 95%) in a volume ratio of 1:1:2.
2. SC1: is a mixture of 5%  $H_2O_2$  and 1%  $NH_4OH$ .
3. MAE2: is prepared with a volume ratio of 1:1:3 for HF (49%),  $HNO_3$  (49%), and  $CH_3COOH$  (95%).
4. Secco: is a mixture of 49% HF and 0.15 M  $K_2Cr_2O_7$  solution in a volume ratio of 2:1.

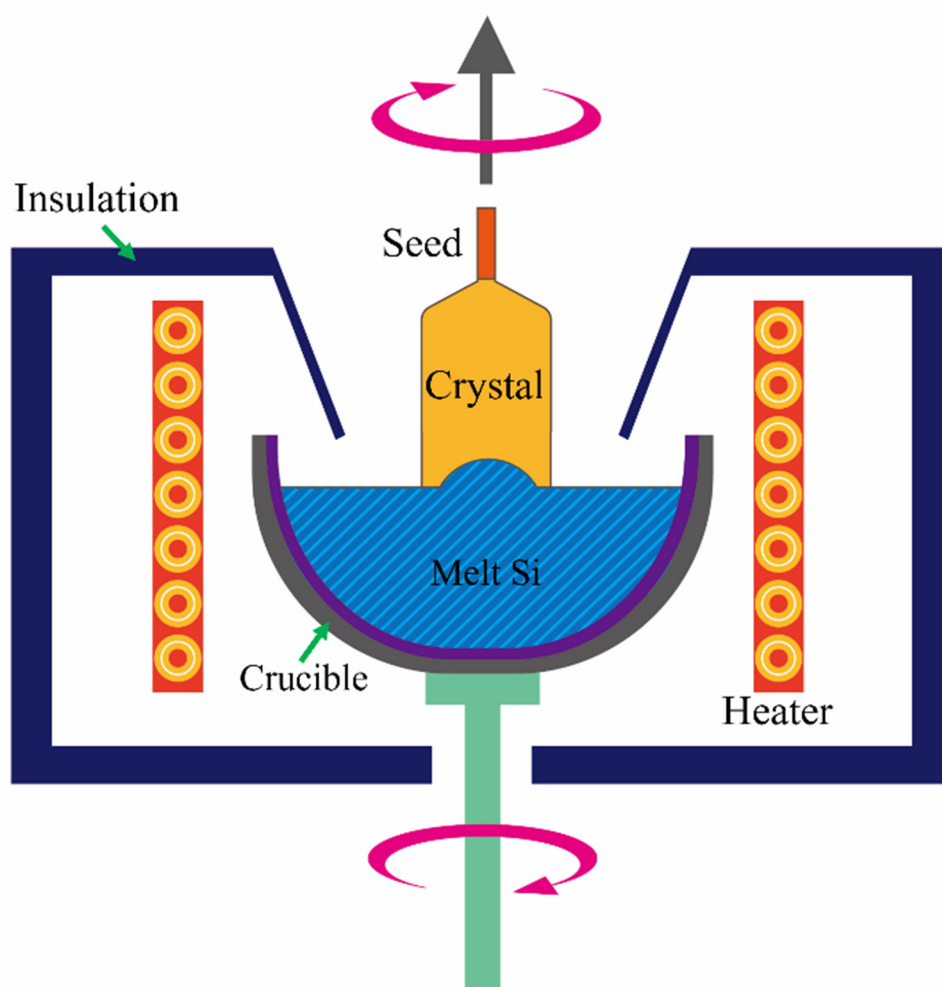

Figure S1. Schematic diagram of Czochralski furnace.

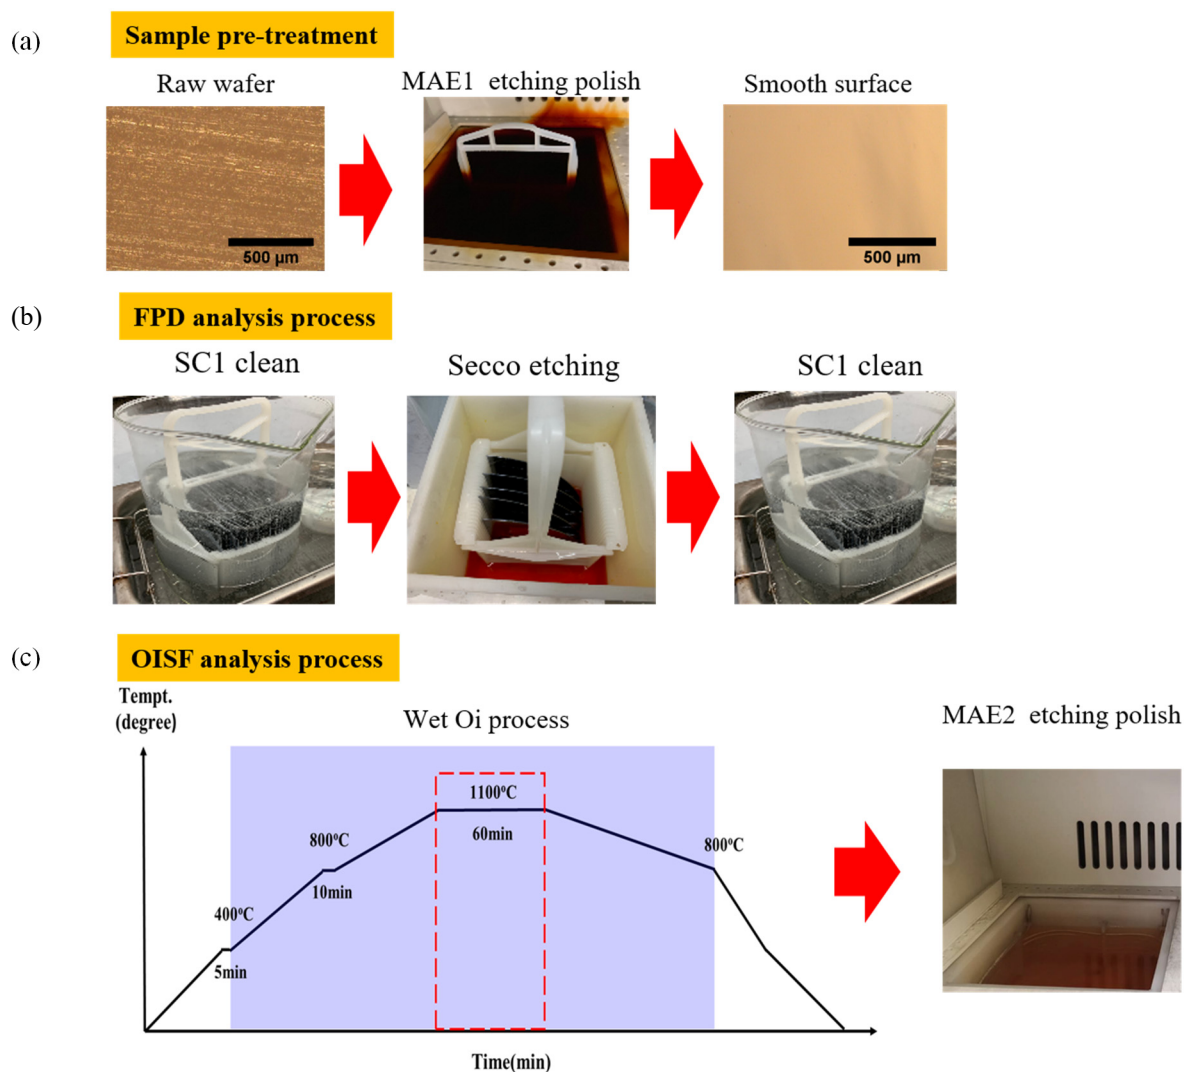

**Figure S2.** Flowchart of (a) sample pre-treatment, (b) pre-treatment for flow pattern defects (FPDs) analysis, and (c) pre-treatment for oxidation induced stacking faults (OISFs) analysis. The purple background indicates that the sample is under a high temperature wet oxidation.

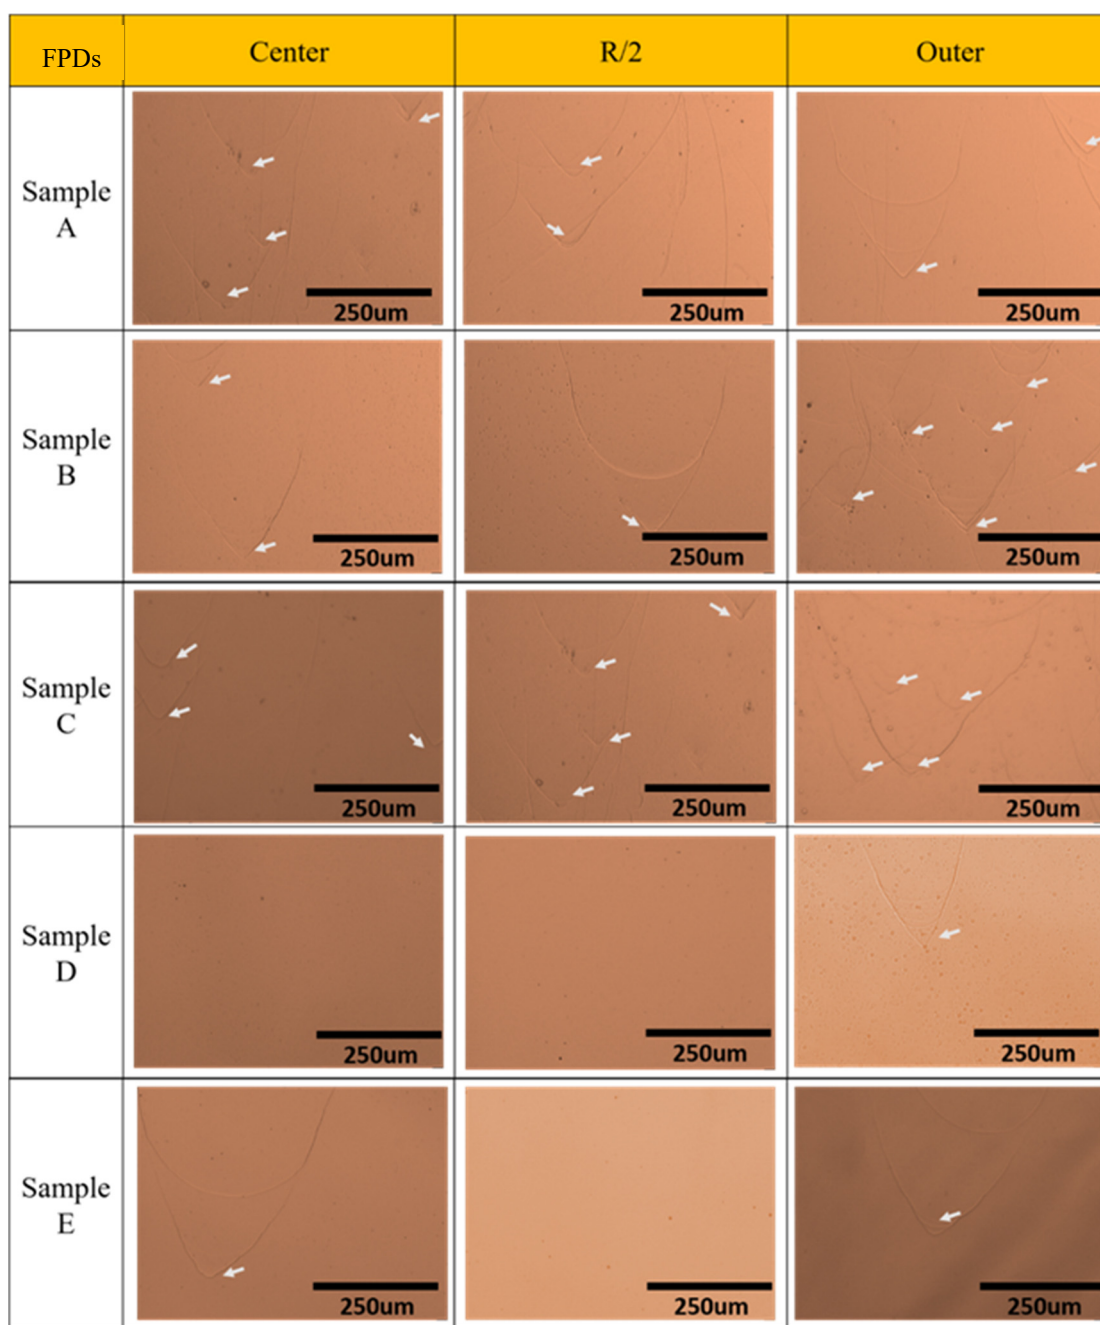

**Figure S3.** Optical microscope (OM) images for FPDs at the radial distribution after Secco etching. The Center, R/2, and Outer represent locations around  $5 \pm 5$ ,  $60 \pm 5$ , and  $120 \pm 5$  mm, respectively.

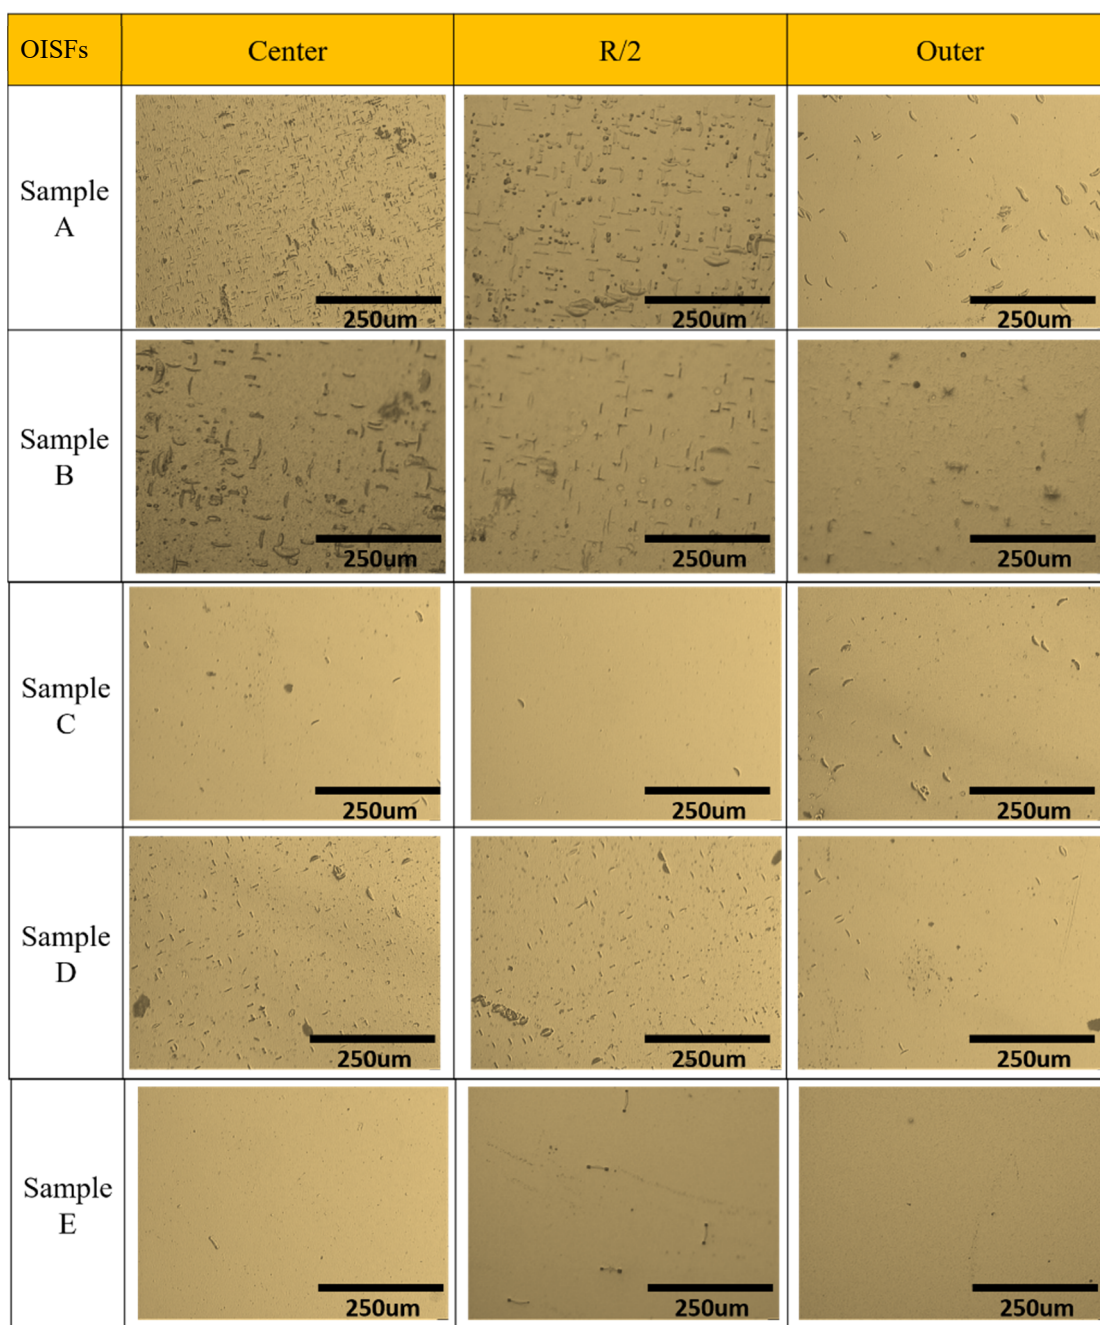

**Figure S4.** OM image for OISFs from the radial distribution after the high-temperature wet oxygen process and MAE2 etching. Center, R/2, and Outer represent locations around  $5 \pm 5$ ,  $60 \pm 5$ , and  $120 \pm 5$  mm, respectively.

**Table S1.** Parameters for a high temperature wet oxidation.

| Segment    | 1   | 2   | 3   | 4   | 5    | 6    | 7   | 8   |
|------------|-----|-----|-----|-----|------|------|-----|-----|
| Temp. (°C) | 400 | 400 | 800 | 800 | 1100 | 1100 | 800 | 400 |
| Time (min) | 45  | 5   | 50  | 10  | 60   | 60   | 100 | 30  |
| Dry oxygen |     |     | V   | V   | V    | V    | V   |     |
| Wet oxygen |     |     |     |     |      | V    |     |     |

V represents under the particular process.
